# Supplementary material for: Cell-Specific Cre Recombinase Expression Allows Selective Ablation of Glutamate Receptors from Mouse Horizontal Cells
Source: PubMed Central journal article supplement (PMC3861464; doi:10.1371/journal.pone.0083076), 2013-12-12
Supplement: pone.0083076.s001.pdf [file pone.0083076.s001.pdf]

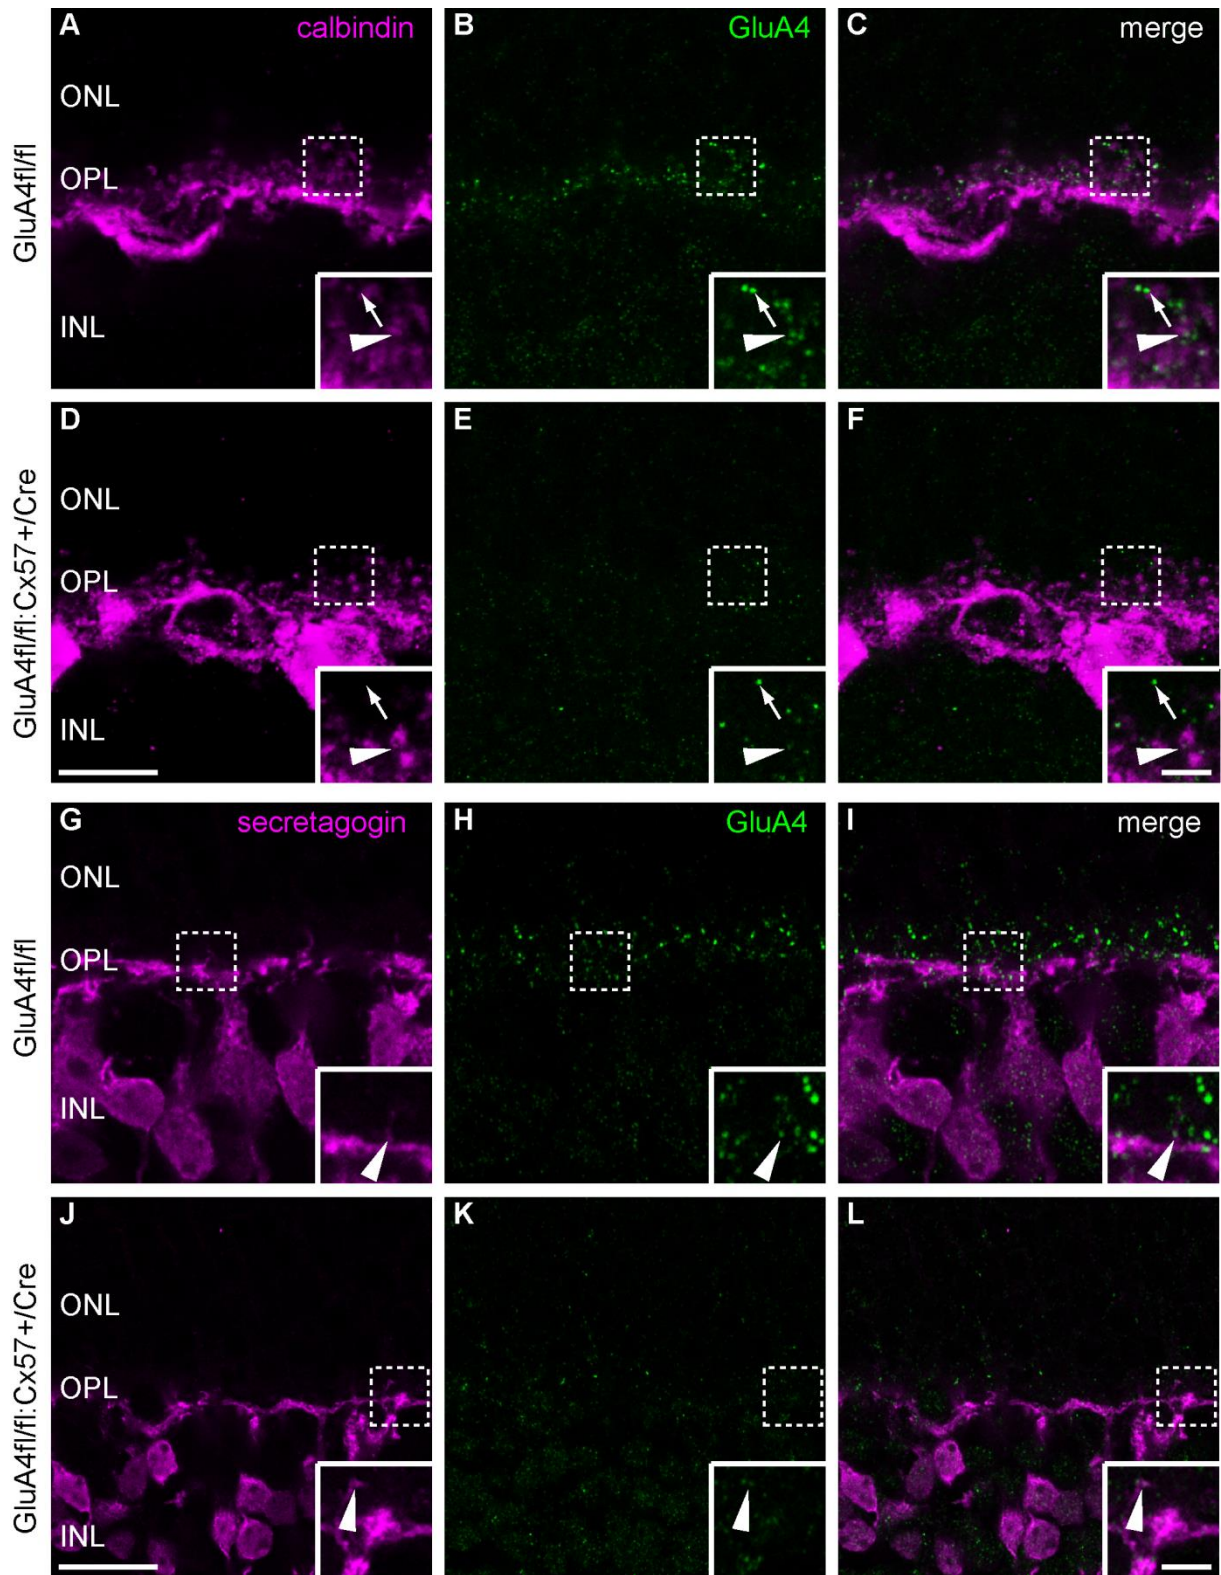

**Figure S1. OFF bipolar and few horizontal cell dendrites show GluA4 immunoreactivity in GluA4fl/fl:Cx57+/Cre mice.**

**A-F,** Double labeling for calbindin and GluA4 in GluA4fl/fl (A-C) and GluA4fl/fl:Cx57+/Cre mice (D-F). GluA4 immunoreactivity shows large and bright patches in the outer plexiform

layer of GluA4fl/fl mice (B). Most patches are associated with calbindin-positive horizontal cell dendrites (C, inset, arrowhead) and only a few patches are not (C, inset, arrow). In contrast, GluA4-immunoreactive puncta appear smaller and are less bright and numerous in GluA4fl/fl:Cx57+/Cre mice (E) in which they occasionally colocalize with calbindin-positive horizontal cell dendrites (F, inset, arrowheads). However, most remaining GluA4-positive puncta are not colocalized with calbindin (F, inset, arrow).

**G-I**, Double labeling for GluA4 and secretagogin, a bipolar cell marker, in GluA4fl/fl (G-I) and GluA4fl/fl:Cx57+/Cre mice (J-L). GluA4-immunoreactive puncta colocalize with secretagogin-positive OFF bipolar cell dendrites in the proximal OPL (I, L, insets, arrowheads) in both genotypes. All images are maximum projections of three confocal images (0.51  $\mu\text{m}$ ). Dashed squares are shown enlarged as insets. Scale bars: D, J: 10  $\mu\text{m}$ ; F, L: 2.5  $\mu\text{m}$ .

INL, inner nuclear layer; ONL, outer nuclear layer; OPL, outer plexiform layer.
